# Supplementary material for: Aurivillius-layered Bi2WO6 nanoplates with CoOx cocatalyst as high-performance piezocatalyst for hydrogen evolution
Source: Royal Society of Chemistry journal article supplement (doi:10.1039/d3dt02077k), 2023-01-01
Supplement: d3dt02077k1.pdf [file d3dt02077k1.pdf]

## Supporting Information

Aurivillius-layered  $\text{Bi}_2\text{WO}_6$  nanoplates with  $\text{CoO}_x$  cocatalyst as high-performance piezocatalyst for hydrogen evolution

Lining Tan<sup>a</sup>, Xinran Sun<sup>a</sup>, Jintao Zhang<sup>a</sup>, Chengchao Jin<sup>b</sup>, Fei Wang<sup>a,\*</sup> and Daiming Liu<sup>a,\*</sup>

<sup>a</sup> College of Electromechanical Engineering, Shandong Engineering Laboratory for Preparation and Application of High-performance Carbon-Materials, Qingdao University of Science & Technology, Qingdao 266061, China.

<sup>b</sup> School of Chemistry and Materials Science, Hangzhou Institute for Advanced Study, University of Chinese Academy of Sciences, Hangzhou 310024, China.

\* Corresponding authors: F. Wang ([elliott\\_wang@qust.edu.cn](mailto:elliott_wang@qust.edu.cn)) and D. Liu ([daimingliu@qust.edu.cn](mailto:daimingliu@qust.edu.cn)).

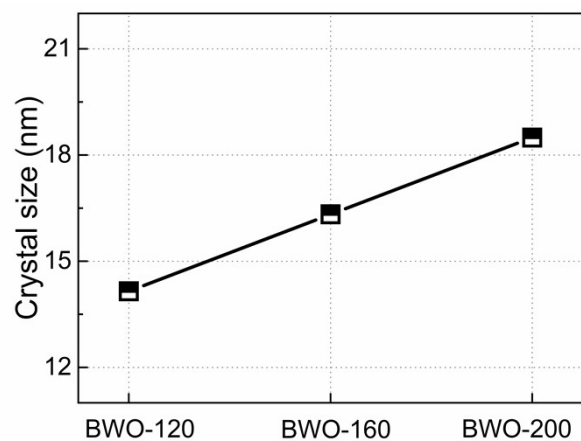

**Fig. S1** Calculated crystal size of BWO samples

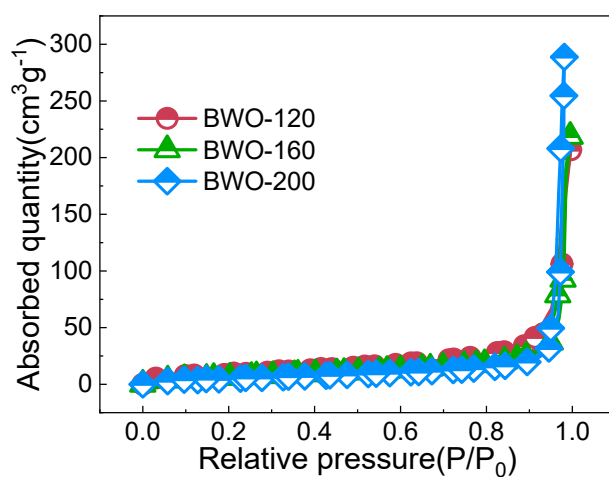

**Fig. S2** N<sub>2</sub> sorption isotherm curves of BWO catalysts.

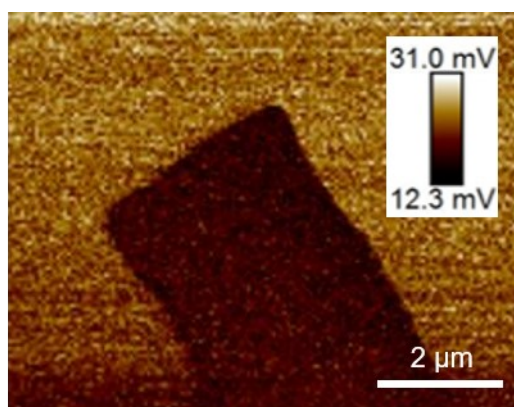

Hs PR Amplitude

**Fig. S3** Amplitude images of BWO catalysts.

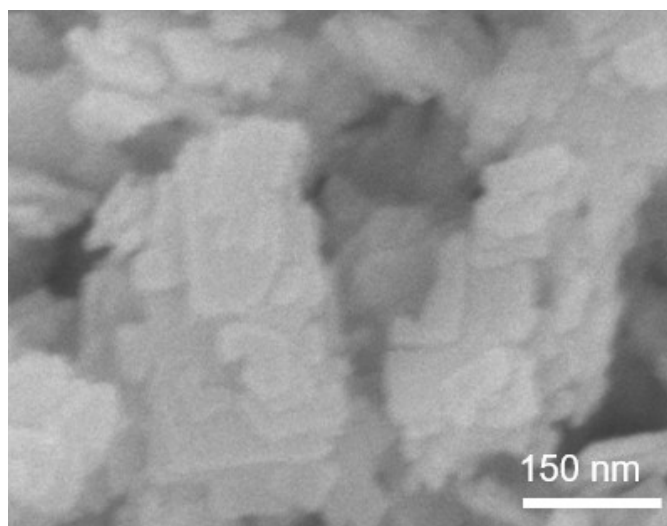

**Fig. S4** SEM image of BWO-160 after 4 piezocatalytic HER cycles

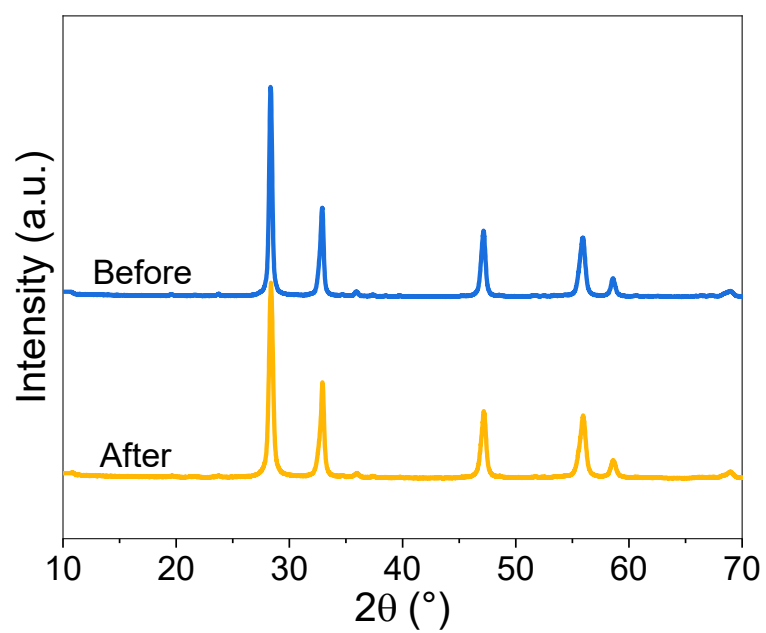

**Fig. S5** XRD patterns of BWO-160 before and after piezocatalysis.

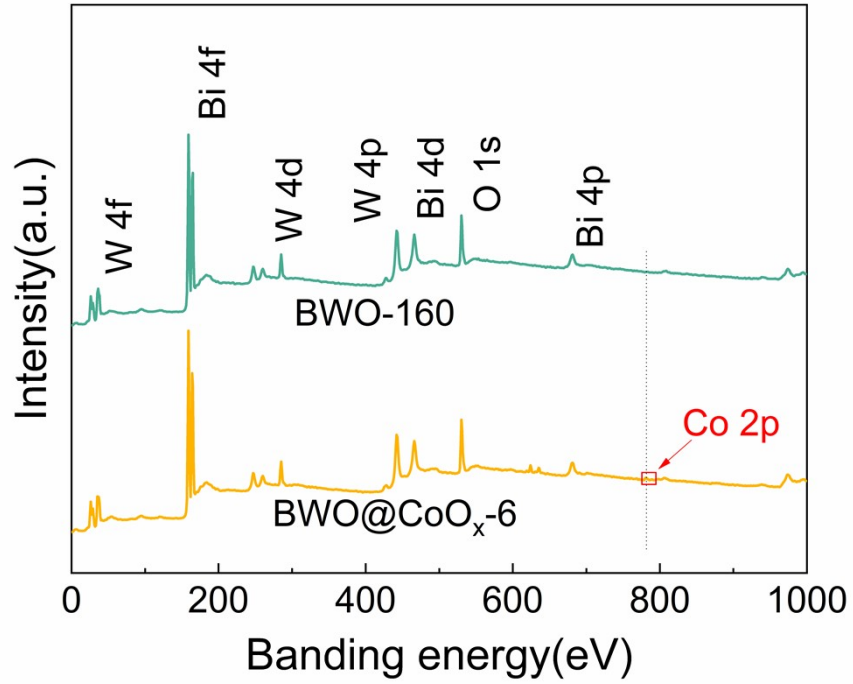

**Fig. S6** XPS survey spectra of BWO-160 and BWO@CoO<sub>x</sub>-6.

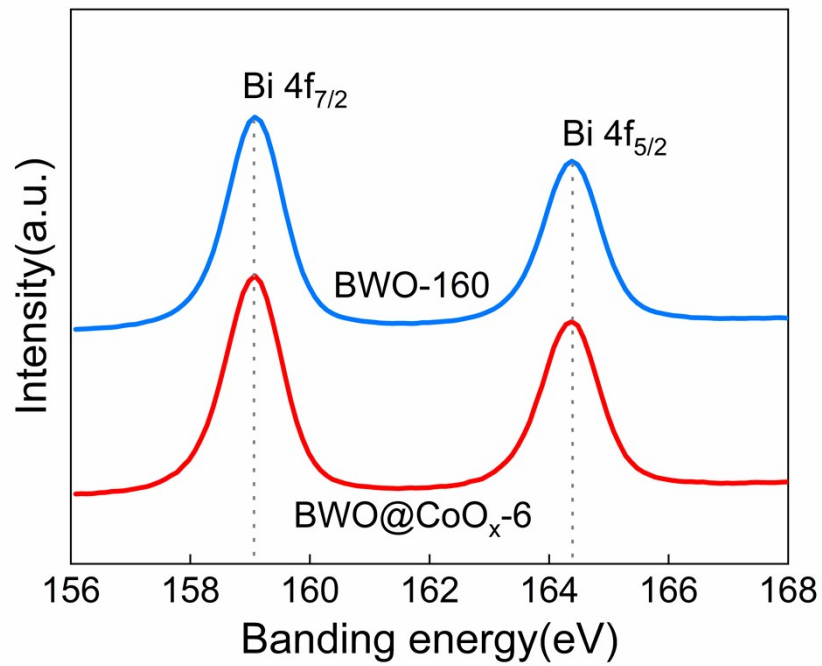

**Fig. S7** High-resolution XPS scan spectra of Bi 4f in BWO-160 and BWO@CoO<sub>x</sub>-6.

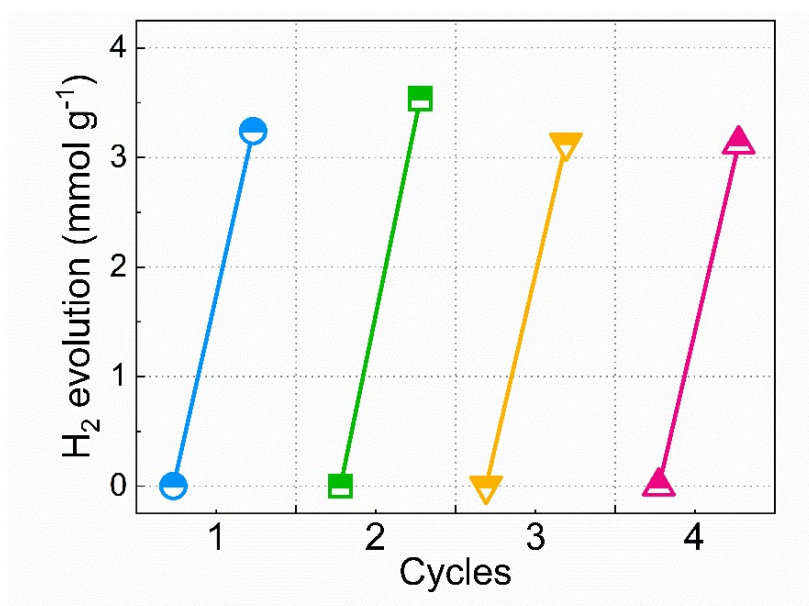

Fig. S8 Piezocatalytic HER cycling of BWO@CoO<sub>x</sub>-6.
